# Supplementary material for: Genome-wide QTL mapping of nine body composition and bone mineral density traits in pigs
Source: Genet Sel Evol. 2014 Oct 28;46(1):68. doi: 10.1186/s12711-014-0068-2 (PMC4210560; doi:10.1186/s12711-014-0068-2)
Supplement: Additional file 4: — Genome-wide confidence intervals for BMD. Description: The consecutive QTL number based on Additional file 1 is given for each confidence interval (CI) as well as chromosome, peak-position with respective LRT-value, CI position in bp and distance in Mb. Genes listed in the last column are all known, characterized genes according to Ensembl and NCBI genome browsers. Genes in bold characters are candidate genes that are based on a literature search for related traits and pathways in the pig and other species. Genes that were shown to be associated with related traits in Fan et al. [39] are marked with asterisks. [file 12711_2014_68_MOESM4_ESM.xlsx]

## Sheet: Tabelle1
QTL	Chr	Peak	LRT	CI start	CI end	Distance	Genes
32	6	37403520	35.14	36937640	37714128	0.776488	only uncharacterized genes
56	12	57593680	34.64	57195896	57797120	0.601224	WDR16, USP43, DHRS7C, GLP2R, RCVRN, GAS7[1]
[1]	Chao CC-K, Hung F-C, Chao JJ: Gas7 is required for mesenchymal stem cell-derived bone development. Stem Cells Int 2013, 2013:137010.
Genes in bold characters represent both, those with a direct influence on the appropriate trait and those with an effect on the related traits.
